# Supplementary material
Source: publisher site journal article supplement (https://www.dovepress.com/article/467400)
Supplement: Supplementary file 1 [file get_supplementary_file.php]

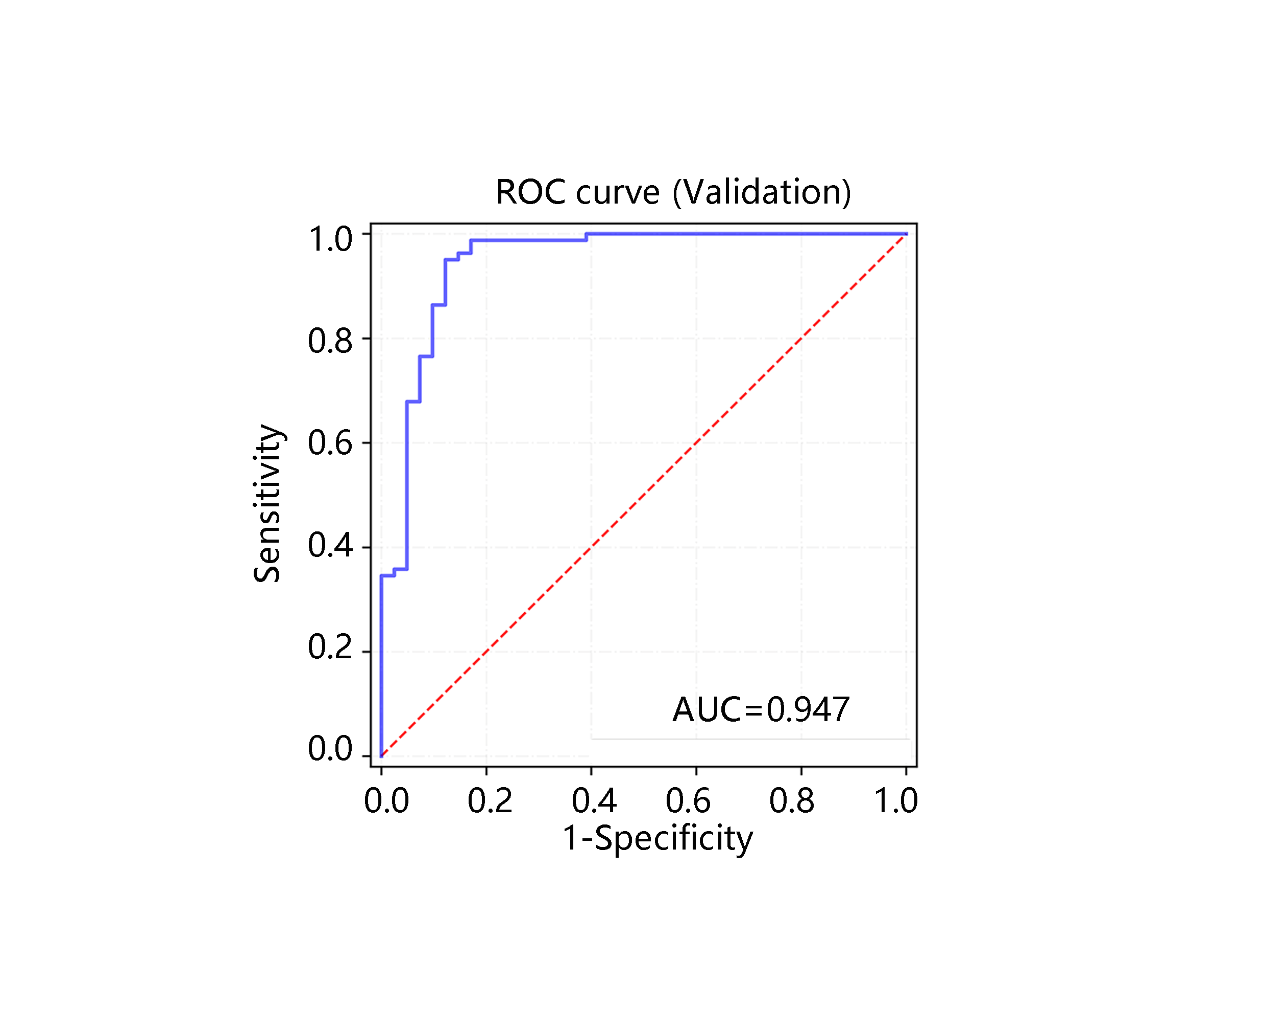


**Figure S1.** Performance of logistic regression model in the validation cohort. **Abbreviations:** ROC, receiver operating characteristic; AUC, are under the curve.
